# Supplementary material for: The Relationship between Defensive pessimism, Goal Orientation and Self Esteem among Faculty Nursing Students
Source: Research Square preprint supplement (doi:10.21203/rs.3.rs-3229305/v1), 2023-08-17
Supplement: Supplementary file 1 [file 4ad8b163aec5c1a87494baa9.docx]

**Table (1): Distribution of the students according to social and demographic characteristics (n = 400)**

| **Demographic data** | **Frequency n = 400** | **%** |
| --- | --- | --- |
| | **Sex**  Male | | --- | | Female | | | 90 | | --- | | 310 | | | 22.5 | | --- | | 77.5 | |
| **Age (years)**  18< 20  20< 22  22+ | 185  170  45 | 46.25  42.5  11.25 |
| **Min-Max**  **Mean± SD** | 18 -24  20.02 ±1.35 | |
| **Residency** |  |  |
| Urban | 98 | 24.5 |
| Rural | 302 | 75.5 |
| **Marital status**  Single  Married | 367  33 | 91.8  8.2 |
| **Perception of monthly expense** |  |  |
| Inadequate | 108 | 27.0 |
| Adequate | 292 | 73.0 |
|  | | |

**Table (2): Distribution of students’ academic probertites**

| **Academic characteristics** | **Frequency N = 400** | |  | **%** | |
| --- | --- | --- | --- | --- | --- |
| **Year of enrollment** |  | |  |  | |
| - First | 100 | |  | 25.0 | |
| - Second | 100 | |  | 25.0 | |
| - Third | 100 | |  | 25.0 | |
| - Fourth | 100 | |  | 25.0 | |
| **Student's academic achievement in previous academic year (n = 300) *** |  | |  |  | |
| - Failure | 2 | |  | 0.6 | |
| - Pass | 5 | |  | 1.7 | |
| - Good | 35 | |  | 11.7 | |
| - Very Good | 123 | |  | 41 | |
| - Excellent | 135 | |  | 45 | |
| **Extra-curricular activities** | |  | |  | |
| - No - Yes | | 331  69 | |  | 82.8  17.2 |

*** First year was not among the student's grade in previous academic year.**

**Figure (2):** **Distribution of students according to total score of defensive pessimism (n = 400)**.

**Figure (3): Distribution of students according to total score of goal orientation (n = 400).**


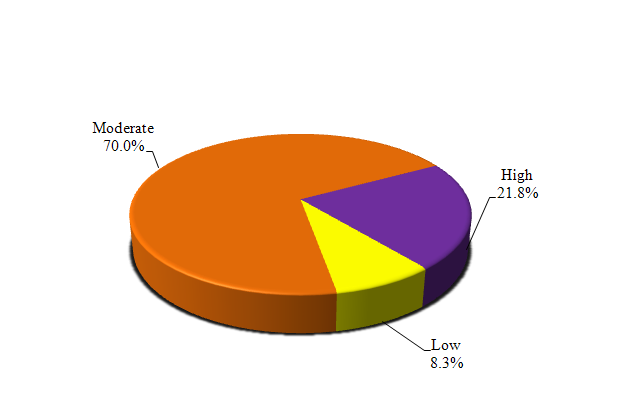


**Figure (4):** **Distribution of students according to total score of self-esteem
 (n = 400).**

**Table (3):** **Correlation between defensive pessimism, goal orientation and self-esteem among studied students (n = 400)**

|  | **Defensive Pessimism** | | **Self esteem** | |
| --- | --- | --- | --- | --- |
| **R** | **P** | **r** | **p** |
| **Goal Orientation** | **0.291*** | **<0.001*** | **-0.041** | **0.411** |
| - **Mastery-approach goals** | **-** | **-** | **0.335*** | **<0.001*** |
| - **Mastery-avoidance goals** | **-** | **-** | **-0.351*** | **<0.001*** |
| - **Performance-approach goals** | **-** | **-** | **0.142*** | **<0.001*** |
| - **Performance-avoidance goals** | **-** | **-** | **-0.225*** | **<0.001*** |
| **Self esteem** | **-0.246*** | **<0.001*** | **-** | **-** |

**r: Pearson coefficient**

***: Statistically significant at p ≤ 0.05**

**Table (4):** **Relation between mean scores of defensive pessimisms, goal orientation, self-esteem, and social and demographic and academic probertites of students (n = 400)**

| **Socio-Demographic and academic characteristics** | **N** | **Defensive pessimism** | | **Goal orientation** | | **Self Esteem** | |
| --- | --- | --- | --- | --- | --- | --- | --- |
| **Mean ± SD.** | **Median** | **Mean ± SD.** | **Median** | **Mean ± SD.** | **Median** |
| **Sex** |  |  |  |  |  |  |  |
| Male | **90** | 65.22 ± 13.49 | 65.48 | 61.79 ± 19.53 | 61.11 | 65.78 ± 17.26 | 70.0 |
| Female | **310** | 63.02 ± 12.70 | 64.29 | 65.68 ± 15.21 | 65.28 | 64.70 ± 15.98 | 63.33 |
| **U(p)** |  | **12614.50 (0.166)** | | **13116.0 (0.386)** | | **12078.0 (0.052)** | |
| **Residency** |  |  |  |  |  |  |  |
| Urban | **98** | 65.46 ± 12.56 | 66.67 | 62.90 ± 15.90 | 63.19 | 67.72 ± 15.52 | 70.0 |
| Rural | **302** | 62.88 ± 12.96 | 64.29 | 65.42 ± 16.46 | 65.28 | 64.04 ± 16.41 | 63.33 |
| **U(p)** |  | **13202.0 (0.108)** | | **12719.0* (0.036*)** | | **14133.50 (0.504)** | |
| **Marital status** |  |  |  |  |  |  |  |
| Single | **367** | 63.76 ± 12.99 | 64.29 | 64.90 ± 16.41 | 65.28 | 64.51 ± 16.44 | 63.33 |
| Married | **33** | 60.79 ± 11.63 | 61.90 | 63.72 ± 15.74 | 65.28 | 69.70 ± 13.39 | 66.67 |
| **U(p)** |  | **5320.50 (0.248)** | | **5032.0 (0.106)** | | **5675.50 (0.550)** | |
| **Monthly expense** |  |  |  |  |  |  |  |
| Inadequate | **108** | 66.24 ± 13.93 | 67.26 | 67.55 ± 15.14 | 66.67 | 60.80 ± 17.72 | 63.33 |
| Adequate | **292** | 62.51 ± 12.36 | 64.29 | 63.78 ± 16.67 | 63.89 | 66.47 ± 15.44 | 66.67 |
| **U(p)** |  | **12994.50* (****0.007*)** | | **12983.0* (0.006*)** | | **13722.50* (0.046*)** | |
| **Year of enrollment** |  |  |  |  |  |  |  |
| First | **100** | 66.67 ± 11.62 | 66.07 | 67.15 ± 17.05 | 68.06 | 64.23 ± 19.39 | 70.0 |
| Second | **100** | 64.14 ± 13.08 | 65.48 | 65.01 ± 13.61 | 65.28 | 66.70 ± 15.50 | 70.0 |
| Third | **100** | 61.02 ± 14.09 | 63.10 | 64.86 ± 17.65 | 65.97 | 62.33 ± 15.71 | 63.33 |
| Fourth | **100** | 62.23 ± 12.12 | 63.69 | 62.18 ± 16.61 | 62.50 | 66.50 ± 13.76 | 66.67 |
| **H(p)** |  | **11.066*** **(0.011*)** | | **5.413 (0.144)** | | **5.700 (0.127)** | |
| **Student's academic achievement in previous academic year** |  |  |  |  |  |  |  |
| Failure | **2** | 71.43 ± 0.0 | 71.43 | 69.44 ± 0.0 | 69.44 | 56.67 ± 0.0 | 56.67 |
| Pass | **5** | 60.0 ± 2.99 | 59.52 | 61.39 ± 19.40 | 73.61 | 46.67 ± 30.0 | 46.67 |
| Good | **35** | 60.51 ± 15.32 | 63.10 | 64.76 ± 22.10 | 70.83 | 55.52 ± 18.86 | 56.67 |
| Very Good | **123** | 61.09 ± 13.59 | 63.10 | 62.37 ± 16.96 | 62.50 | 64.99 ± 14.79 | 63.33 |
| Excellent | **135** | 65.46 ± 11.90 | 66.67 | 66.32 ± 14.77 | 66.67 | 66.88 ± 15.70 | 70.0 |
| **H(p)** |  | **15.334* (0.004*)** | | **14.435* (0.006*)** | | **5.704 (0.222)** | |
| **Extra-curricular activities** |  |  |  |  |  |  |  |
| No | **331** | 62.91 ± 13.04 | 64.29 | 65.09 ± 16.24 | 65.28 | 64.12 ± 16.02 | 63.33 |
| Yes | **69** | 66.43 ± 11.82 | 66.67 | 63.41 ± 16.87 | 62.50 | 68.89 ± 16.94 | 70.0 |
| **U(p)** |  | **9192.0*** **(0.011*)** | | **9318.50* (0.016*)** | | **10399.0 (0.242)** | |

**SD**: **Standard deviation** **U: Mann Whitney test** **H**: H for **Kruskal Wallis test**

**p: p value for comparing between the studied categories *: Statistically significant at p ≤ 0.05.**
